# Supplementary material for: Enhancing the charge transport and luminescence properties of ethyl 4-[( E )-(2-hydroxy-4-methoxyphenyl)methyleneamino]benzoate through complexation: a DFT and TD-DFT study
Source: Royal Society of Chemistry journal article supplement (doi:10.1039/d4ra02250e), 2024-01-01

## Royal Society Advances

### Electronic Supplementary Material (ESM) for

### Enhancing the Charge Transport and Luminescent Properties of Ethyl 4-[(E)-(2-hydroxy-4-methoxyphenyl)methyleneamino]benzoate Through Complexation: A DFT and TD-DFT study

Dinyuy Emmanuel Kiven<sup>1</sup>, Fitzgerald Kogge Bine<sup>2</sup>, Nyiang Kennet Nkungli<sup>1</sup>, Tamafo Fouegue Aymard Dider<sup>3</sup>, Stanley Numbonui Tashah<sup>1</sup> and Julius Numbonui Ghogomu<sup>1, 4\*</sup>

<sup>1</sup>Department of Chemistry, Faculty of Science, The University of Bamenda, P. O. Box 39, Bambili, Bamenda, Cameroon

<sup>2</sup>Department of Fundamental and Transversal Sciences, National Advanced School of Public Works, P.O Box 510, Yaounde, Cameroon.

<sup>3</sup>Department of Chemistry, Ecole Normale Supérieure, Université de Bertoua, P.O Box 652, Bertoua, Cameroon

<sup>4</sup>Research Unit of Noxious Chemistry and Environmental Engineering, Department of Chemistry, Faculty of Science, University of Dschang, P.O Box 67, Dschang, Cameroon

Correspondence should be addressed to: Julius Numbonui Ghogomu, [ghogsjuju@hotmail.com](mailto:ghogsjuju@hotmail.com)

### A. Cartesian coordinates of atoms in the optimized geometries of EMAB, [Ir(EMAB)<sub>2</sub>]<sup>+</sup>, [Pd(EMAB)<sub>2</sub>], [Rh(EMAB)<sub>2</sub>]<sup>+</sup>, [Zn(EMAB)<sub>2</sub>], [Pt(EMAB)<sub>2</sub>], [Ni(EMAB)<sub>2</sub>] and Cu[EMAB]<sub>2</sub> in gas phase at the PBE0-D3(BJ)/def2-TZVP level of theory

**ESM Table S1** Cartesian coordinates of atoms in the optimized geometries of EMAB in gas phase

|   |          |           |           |
|---|----------|-----------|-----------|
| C | 4.793718 | 1.174157  | -0.292323 |
| C | 3.418777 | 0.989931  | -0.226238 |
| C | 2.887329 | -0.293323 | 0.104518  |
| C | 3.787714 | -1.338908 | 0.359959  |
| C | 5.155734 | -1.164479 | 0.294412  |
| C | 5.654835 | 0.108980  | -0.036077 |
| H | 5.196912 | 2.149066  | -0.543129 |
| H | 3.387414 | -2.317494 | 0.615302  |
| H | 5.816398 | -1.997679 | 0.496289  |
| O | 6.975378 | 0.400674  | -0.129559 |
| C | 7.916494 | -0.642104 | 0.121769  |

|   |           |           |           |
|---|-----------|-----------|-----------|
| H | 7.797575  | -1.466656 | -0.592537 |
| H | 7.824834  | -1.022815 | 1.146950  |
| H | 8.899743  | -0.188254 | -0.009400 |
| O | 2.617461  | 2.030938  | -0.472895 |
| H | 1.676564  | 1.702110  | -0.362416 |
| C | 1.475900  | -0.524535 | 0.183712  |
| N | 0.610783  | 0.417358  | -0.027421 |
| H | 1.154958  | -1.540386 | 0.458598  |
| C | -0.759317 | 0.146544  | -0.009361 |
| C | -1.620060 | 1.138595  | 0.481213  |
| C | -1.305706 | -1.049431 | -0.503197 |
| C | -2.986900 | 0.925305  | 0.520886  |
| H | -1.191296 | 2.068561  | 0.842366  |
| C | -2.673776 | -1.254826 | -0.469299 |
| H | -0.656161 | -1.797364 | -0.948611 |
| C | -3.527943 | -0.277029 | 0.050025  |
| H | -3.644718 | 1.691976  | 0.914443  |
| H | -3.108654 | -2.171407 | -0.855595 |
| C | -4.982980 | -0.559361 | 0.059287  |
| O | -5.481470 | -1.588604 | -0.349497 |
| O | -5.697412 | 0.463038  | 0.585241  |
| C | -7.137107 | 0.283051  | 0.613597  |
| C | -7.757724 | 0.627867  | -0.725158 |
| H | -7.359334 | -0.748978 | 0.902427  |
| H | -7.475448 | 0.963913  | 1.399687  |
| H | -7.417691 | -0.065299 | -1.498594 |
| H | -8.848181 | 0.555617  | -0.653305 |

H -7.499149 1.649073 -1.021048

**ESM Table S2** Cartesian coordinates of atoms in the optimized geometries of [Ir(EMAB)<sub>2</sub>]<sup>+</sup> in gas phase

|   |          |          |          |
|---|----------|----------|----------|
| H | -6.04543 | -2.17159 | -0.81777 |
| C | -6.11235 | -3.01076 | -0.11801 |
| H | -6.02540 | -2.65116 | 0.91312  |
| H | -7.05966 | -3.53160 | -0.25039 |
| O | -5.09514 | -3.99742 | -0.39222 |
| C | -3.81520 | -3.63349 | -0.34178 |
| C | -3.38002 | -2.35164 | -0.01009 |
| C | -2.88239 | -4.65876 | -0.65804 |
| C | -1.54937 | -4.37227 | -0.65801 |
| C | -2.01633 | -2.05110 | -0.03251 |
| C | -1.05934 | -3.06530 | -0.37293 |
| H | -4.06358 | -1.55252 | 0.24989  |
| H | -3.25744 | -5.64793 | -0.89502 |
| H | -0.83288 | -5.15345 | -0.89765 |
| O | -1.68130 | -0.82143 | 0.27969  |
| C | 0.33056  | -2.86393 | -0.36202 |
| N | 0.97587  | -1.72047 | -0.16374 |
| H | 0.95253  | -3.75190 | -0.49490 |
| C | 2.40560  | -1.80503 | -0.11953 |
| C | 3.07914  | -1.30839 | 0.99537  |
| C | 3.10937  | -2.36109 | -1.18792 |
| C | 4.49279  | -2.42136 | -1.13416 |
| C | 4.46214  | -1.38466 | 1.04953  |
| C | 5.17729  | -1.93785 | -0.01673 |
| C | 6.66608  | -2.03784 | -0.02100 |

|   |          |          |          |
|---|----------|----------|----------|
| C | 8.65968  | -1.63519 | 1.21364  |
| C | 9.08437  | -3.01122 | 1.67967  |
| O | 7.20699  | -1.54445 | 1.10745  |
| O | 7.29910  | -2.50459 | -0.94295 |
| H | 8.91751  | -0.86328 | 1.94308  |
| H | 9.09650  | -1.38519 | 0.24226  |
| H | 8.61215  | -3.26217 | 2.63399  |
| H | 10.17002 | -3.02722 | 1.81964  |
| H | 8.82486  | -3.77121 | 0.93858  |
| H | 2.51091  | -0.87728 | 1.81387  |
| H | 4.99285  | -1.01693 | 1.92032  |
| H | 2.57702  | -2.70820 | -2.06921 |
| H | 5.06619  | -2.83493 | -1.95760 |
| N | -0.92500 | 1.83007  | -0.08203 |
| O | 1.77326  | 0.93669  | -0.36274 |
| C | -2.35934 | 1.81539  | -0.11487 |
| C | -3.09108 | 2.31573  | 0.95840  |
| C | -2.99999 | 1.20319  | -1.19152 |
| C | -4.47226 | 2.16240  | 0.97536  |
| C | -4.37299 | 1.03786  | -1.16237 |
| C | -5.11491 | 1.49541  | -0.06931 |
| C | -6.56797 | 1.17139  | -0.03166 |
| C | -8.66159 | 1.65540  | 0.99405  |
| C | -8.89219 | 0.50149  | 1.94589  |
| O | -7.23559 | 1.93292  | 0.84660  |
| O | -7.06929 | 0.30038  | -0.71643 |
| H | -5.04840 | 2.52300  | 1.82029  |

|    |          |          |          |
|----|----------|----------|----------|
| H  | -4.88914 | 0.53761  | -1.97573 |
| H  | -2.57738 | 2.76689  | 1.80273  |
| H  | -2.41052 | 0.83128  | -2.02412 |
| H  | -9.07060 | 2.59011  | 1.38446  |
| H  | -9.08122 | 1.45496  | 0.00414  |
| H  | -9.96771 | 0.36590  | 2.09792  |
| H  | -8.43203 | 0.69940  | 2.91845  |
| H  | -8.48700 | -0.42807 | 1.53732  |
| C  | -0.32944 | 3.00416  | -0.02564 |
| C  | 1.05939  | 3.24372  | -0.06945 |
| C  | 2.04935  | 2.22422  | -0.26972 |
| C  | 3.38748  | 2.58557  | -0.38812 |
| C  | 3.77710  | 3.92658  | -0.29899 |
| C  | 1.49551  | 4.58898  | 0.00265  |
| C  | 2.81759  | 4.94406  | -0.09816 |
| C  | 5.58463  | 5.49534  | -0.35244 |
| H  | 5.16253  | 6.10330  | -1.15990 |
| H  | 5.35967  | 5.94199  | 0.62214  |
| H  | 6.66337  | 5.41241  | -0.47955 |
| O  | 5.08994  | 4.14627  | -0.42030 |
| H  | 4.13338  | 1.81475  | -0.55028 |
| H  | 0.74928  | 5.36622  | 0.14654  |
| H  | 3.10459  | 5.98548  | -0.03135 |
| H  | -0.97962 | 3.88193  | 0.01381  |
| Ir | 0.04678  | 0.05839  | -0.05805 |

**ESM Table S3** Cartesian coordinates of atoms in the optimized geometries of [Pd(EMAB)<sub>2</sub>] in gas phase

|   |           |           |           |
|---|-----------|-----------|-----------|
| H | -6.056745 | -2.069830 | -0.883104 |
|---|-----------|-----------|-----------|

|   |           |           |           |
|---|-----------|-----------|-----------|
| C | -6.149741 | -2.897464 | -0.169784 |
| H | -6.059250 | -2.510226 | 0.853345  |
| H | -7.120247 | -3.379760 | -0.293551 |
| O | -5.177044 | -3.917286 | -0.420501 |
| C | -3.870840 | -3.569358 | -0.358775 |
| C | -3.423546 | -2.301932 | -0.033435 |
| C | -2.957892 | -4.608137 | -0.662964 |
| C | -1.617675 | -4.334885 | -0.647265 |
| C | -2.041803 | -2.004848 | -0.029452 |
| C | -1.108818 | -3.042460 | -0.356259 |
| H | -4.095755 | -1.488926 | 0.211630  |
| H | -3.341661 | -5.593137 | -0.902734 |
| H | -0.909467 | -5.128280 | -0.875553 |
| O | -1.706343 | -0.796298 | 0.301349  |
| C | 0.295792  | -2.866969 | -0.332157 |
| N | 0.963174  | -1.753188 | -0.165670 |
| H | 0.890044  | -3.780182 | -0.439129 |
| C | 2.379294  | -1.821572 | -0.156654 |
| C | 3.084519  | -1.247349 | 0.903120  |
| C | 3.071799  | -2.434545 | -1.203931 |
| C | 4.456157  | -2.489288 | -1.178343 |
| C | 4.466697  | -1.307784 | 0.928753  |
| C | 5.165627  | -1.929263 | -0.113489 |
| C | 6.646021  | -2.012984 | -0.145197 |
| C | 8.661362  | -1.477115 | 0.997840  |
| C | 9.134360  | -2.802818 | 1.558995  |
| O | 7.213064  | -1.422959 | 0.933153  |

|   |           |           |           |
|---|-----------|-----------|-----------|
| O | 7.281743  | -2.542531 | -1.034001 |
| H | 8.930221  | -0.644749 | 1.654301  |
| H | 9.067422  | -1.299927 | -0.003008 |
| H | 8.695661  | -2.985393 | 2.544688  |
| H | 10.224443 | -2.789243 | 1.664065  |
| H | 8.863760  | -3.623353 | 0.889827  |
| H | 2.532429  | -0.752389 | 1.695705  |
| H | 5.012768  | -0.868826 | 1.755896  |
| H | 2.520157  | -2.836179 | -2.049128 |
| H | 5.010616  | -2.953089 | -1.987866 |
| N | -0.926957 | 1.840970  | -0.135380 |
| O | 1.799646  | 0.942476  | -0.474357 |
| C | -2.345739 | 1.809645  | -0.143803 |
| C | -3.078170 | 2.297411  | 0.937860  |
| C | -3.002018 | 1.204886  | -1.218766 |
| C | -4.458600 | 2.150350  | 0.961654  |
| C | -4.375024 | 1.057500  | -1.192717 |
| C | -5.114747 | 1.510527  | -0.093276 |
| C | -6.568078 | 1.222793  | -0.070541 |
| C | -8.611446 | 1.535360  | 1.105195  |
| C | -8.829248 | 0.209279  | 1.805554  |
| O | -7.196057 | 1.825235  | 0.964067  |
| O | -7.134093 | 0.513524  | -0.880297 |
| H | -5.026594 | 2.500234  | 1.816350  |
| H | -4.896563 | 0.567667  | -2.008740 |
| H | -2.555488 | 2.736507  | 1.782789  |
| H | -2.414107 | 0.818897  | -2.045835 |

|    |           |           |           |
|----|-----------|-----------|-----------|
| H  | -8.996040 | 2.369745  | 1.697966  |
| H  | -9.076211 | 1.545401  | 0.114453  |
| H  | -9.900078 | 0.053489  | 1.973494  |
| H  | -8.322807 | 0.194945  | 2.775408  |
| H  | -8.455191 | -0.616111 | 1.194094  |
| C  | -0.319779 | 2.992674  | -0.055359 |
| C  | 1.077714  | 3.227160  | -0.073629 |
| C  | 2.064271  | 2.202639  | -0.303865 |
| C  | 3.416122  | 2.590829  | -0.372830 |
| C  | 3.796303  | 3.912386  | -0.213705 |
| C  | 1.512801  | 4.563933  | 0.068369  |
| C  | 2.836694  | 4.925583  | 0.013142  |
| C  | 5.588627  | 5.492237  | -0.130392 |
| H  | 5.185240  | 6.149063  | -0.911628 |
| H  | 5.326226  | 5.888612  | 0.858836  |
| H  | 6.674590  | 5.444937  | -0.224313 |
| O  | 5.130567  | 4.151167  | -0.291166 |
| H  | 4.166533  | 1.828143  | -0.551850 |
| H  | 0.761884  | 5.334478  | 0.228556  |
| H  | 3.120628  | 5.962925  | 0.132992  |
| H  | -0.956168 | 3.882365  | -0.002846 |
| Pd | 0.044483  | 0.061658  | -0.111510 |

**ESM Table S4** Cartesian coordinates of atoms in the optimized geometries of [Rh(EMAB)<sub>2</sub>]<sup>+</sup> in gas phase

|   |           |           |           |
|---|-----------|-----------|-----------|
| H | -6.068506 | -2.170429 | -0.890843 |
| C | -6.138620 | -2.977990 | -0.154155 |
| H | -6.033586 | -2.571383 | 0.858540  |
| H | -7.097794 | -3.485188 | -0.250853 |



|   |           |           |           |
|---|-----------|-----------|-----------|
| O | -5.143550 | -3.990974 | -0.396183 |
| C | -3.856528 | -3.629680 | -0.364938 |
| C | -3.401139 | -2.349308 | -0.094297 |
| C | -2.931017 | -4.672283 | -0.637966 |
| C | -1.583561 | -4.414853 | -0.653883 |
| C | -2.021684 | -2.076276 | -0.137975 |
| C | -1.077036 | -3.116073 | -0.428576 |
| H | -4.064557 | -1.522025 | 0.126744  |
| H | -3.318491 | -5.667129 | -0.830575 |
| H | -0.887134 | -5.224691 | -0.853741 |
| O | -1.657084 | -0.849272 | 0.109206  |
| C | 0.324272  | -2.914102 | -0.413691 |
| N | 0.946866  | -1.769158 | -0.240889 |
| H | 0.943783  | -3.809619 | -0.507676 |
| C | 2.369620  | -1.818407 | -0.203574 |
| C | 3.038488  | -1.228753 | 0.871499  |
| C | 3.086920  | -2.426076 | -1.237469 |
| C | 4.470803  | -2.441213 | -1.190045 |
| C | 4.422358  | -1.267944 | 0.923981  |
| C | 5.147394  | -1.867709 | -0.109969 |
| C | 6.638638  | -1.922916 | -0.119791 |
| C | 8.626479  | -1.377784 | 1.068600  |
| C | 9.100956  | -2.707438 | 1.613992  |
| O | 7.170506  | -1.341761 | 0.970065  |
| O | 7.279210  | -2.428807 | -1.015438 |
| H | 8.862909  | -0.554160 | 1.746915  |
| H | 9.047376  | -1.173350 | 0.079680  |

|   |           |           |           |
|---|-----------|-----------|-----------|
| H | 8.644860  | -2.915226 | 2.586391  |
| H | 10.187523 | -2.678101 | 1.744372  |
| H | 8.862475  | -3.519976 | 0.923299  |
| H | 2.462798  | -0.763885 | 1.665866  |
| H | 4.946809  | -0.831515 | 1.766414  |
| H | 2.560979  | -2.842165 | -2.092046 |
| H | 5.052262  | -2.888248 | -1.990082 |
| N | -0.919110 | 1.819660  | -0.117258 |
| O | 1.712312  | 0.928373  | -0.463592 |
| C | -2.345099 | 1.799496  | -0.132969 |
| C | -3.073238 | 2.285070  | 0.952592  |
| C | -2.996510 | 1.203158  | -1.214821 |
| C | -4.453213 | 2.132425  | 0.975610  |
| C | -4.370047 | 1.047795  | -1.184072 |
| C | -5.104777 | 1.489028  | -0.079565 |
| C | -6.560569 | 1.176340  | -0.044106 |
| C | -8.644920 | 1.648236  | 1.005583  |
| C | -8.884991 | 0.463790  | 1.916739  |
| O | -7.216442 | 1.915316  | 0.861984  |
| O | -7.073139 | 0.332910  | -0.754134 |
| H | -5.023939 | 2.478744  | 1.830156  |
| H | -4.892917 | 0.565273  | -2.003917 |
| H | -2.554249 | 2.722595  | 1.800728  |
| H | -2.412669 | 0.845336  | -2.057410 |
| H | -9.041909 | 2.572959  | 1.430652  |
| H | -9.070525 | 1.487700  | 0.010936  |
| H | -9.961408 | 0.335739  | 2.068962  |

|    |           |           |           |
|----|-----------|-----------|-----------|
| H  | -8.418245 | 0.621350  | 2.893538  |
| H  | -8.493029 | -0.455389 | 1.473254  |
| C  | -0.330662 | 2.982700  | 0.006137  |
| C  | 1.067713  | 3.213964  | -0.022755 |
| C  | 2.036048  | 2.185475  | -0.291767 |
| C  | 3.392900  | 2.514347  | -0.404590 |
| C  | 3.817542  | 3.827099  | -0.236114 |
| C  | 1.536327  | 4.532328  | 0.118849  |
| C  | 2.874819  | 4.848451  | 0.029700  |
| C  | 5.649107  | 5.367377  | -0.189590 |
| H  | 5.241179  | 6.035358  | -0.956764 |
| H  | 5.430032  | 5.755970  | 0.811548  |
| H  | 6.727446  | 5.279894  | -0.319126 |
| O  | 5.138585  | 4.034108  | -0.345850 |
| H  | 4.110039  | 1.728192  | -0.615359 |
| H  | 0.817661  | 5.326400  | 0.303751  |
| H  | 3.188372  | 5.877409  | 0.155052  |
| H  | -0.971328 | 3.865150  | 0.087568  |
| Rh | 0.032291  | 0.032737  | -0.165804 |

**ESM Table S5** Cartesian coordinates of atoms in the optimized geometries of [Zn(EMAB)<sub>2</sub>] in gas phase

|   |          |          |         |
|---|----------|----------|---------|
| H | -6.24169 | -3.35498 | 1.89323 |
| C | -6.03428 | -4.42821 | 1.80304 |
| H | -5.39288 | -4.74908 | 2.63288 |
| H | -6.97111 | -4.98606 | 1.82697 |
| O | -5.43619 | -4.73176 | 0.54370 |
| C | -4.24305 | -4.16532 | 0.23256 |
| C | -3.54604 | -3.30126 | 1.06406 |

|   |          |          |          |
|---|----------|----------|----------|
| C | -3.73086 | -4.52366 | -1.04429 |
| C | -2.53053 | -3.99512 | -1.44346 |
| C | -2.30042 | -2.74099 | 0.67080  |
| C | -1.77480 | -3.09582 | -0.63109 |
| H | -3.90985 | -3.01363 | 2.04192  |
| H | -4.30177 | -5.20200 | -1.66764 |
| H | -2.13215 | -4.26401 | -2.41928 |
| O | -1.70714 | -1.94458 | 1.51030  |
| C | -0.55205 | -2.61602 | -1.17877 |
| N | 0.30567  | -1.78625 | -0.62839 |
| H | -0.30776 | -2.99898 | -2.17525 |
| C | 1.41755  | -1.32395 | -1.37064 |
| C | 2.63975  | -1.14303 | -0.69920 |
| C | 1.32054  | -0.97831 | -2.73141 |
| C | 2.43411  | -0.49123 | -3.40905 |
| C | 3.74880  | -0.65313 | -1.37998 |
| C | 3.65789  | -0.32639 | -2.74333 |
| C | 4.81160  | 0.20502  | -3.51844 |
| C | 7.12151  | 0.81200  | -3.43336 |
| C | 7.82994  | -0.30777 | -4.18258 |
| O | 5.93044  | 0.32408  | -2.76596 |
| O | 4.76488  | 0.50450  | -4.70022 |
| H | 7.73700  | 1.20590  | -2.62102 |
| H | 6.84167  | 1.62661  | -4.10712 |
| H | 8.07485  | -1.13156 | -3.50472 |
| H | 8.76136  | 0.07020  | -4.61884 |
| H | 7.19862  | -0.68589 | -4.99061 |

|   |          |          |          |
|---|----------|----------|----------|
| H | 2.70011  | -1.39428 | 0.35461  |
| H | 4.68946  | -0.52179 | -0.85776 |
| H | 0.36705  | -1.05666 | -3.24481 |
| H | 2.36842  | -0.21465 | -4.45626 |
| N | -0.26327 | 1.03916  | 1.11244  |
| O | 1.44573  | -0.97684 | 2.41046  |
| C | -1.40691 | 1.61855  | 0.51341  |
| C | -2.01871 | 2.77675  | 1.02636  |
| C | -1.97818 | 0.98043  | -0.60190 |
| C | -3.15294 | 3.30320  | 0.41316  |
| C | -3.10972 | 1.50722  | -1.21062 |
| C | -3.70612 | 2.67713  | -0.71394 |
| C | -4.91954 | 3.19488  | -1.40258 |
| C | -6.60067 | 4.89348  | -1.40883 |
| C | -7.85293 | 4.18013  | -0.91905 |
| O | -5.40593 | 4.31710  | -0.82236 |
| O | -5.42481 | 2.67502  | -2.38332 |
| H | -3.62473 | 4.19180  | 0.81693  |
| H | -3.54999 | 1.02264  | -2.07566 |
| H | -1.63000 | 3.24136  | 1.92703  |
| H | -1.52043 | 0.07523  | -0.98454 |
| H | -6.57742 | 5.93661  | -1.08463 |
| H | -6.51726 | 4.84807  | -2.49820 |
| H | -8.74285 | 4.67708  | -1.32123 |
| H | -7.90844 | 4.20301  | 0.17391  |
| H | -7.85649 | 3.14020  | -1.25519 |
| C | 0.67178  | 1.81276  | 1.61014  |

|    |          |          |         |
|----|----------|----------|---------|
| C  | 1.84002  | 1.42278  | 2.33072 |
| C  | 2.17101  | 0.06334  | 2.71347 |
| C  | 3.35823  | -0.14007 | 3.45139 |
| C  | 4.19853  | 0.91171  | 3.79671 |
| C  | 2.72754  | 2.46505  | 2.70819 |
| C  | 3.88719  | 2.24442  | 3.42148 |
| C  | 6.22841  | 1.59080  | 4.89128 |
| H  | 6.65308  | 2.10256  | 4.01866 |
| H  | 5.75275  | 2.32458  | 5.55377 |
| H  | 7.02430  | 1.07767  | 5.43256 |
| O  | 5.31109  | 0.57187  | 4.50061 |
| H  | 3.61304  | -1.15132 | 3.74743 |
| H  | 2.47763  | 3.48343  | 2.41847 |
| H  | 4.53020  | 3.07435  | 3.68327 |
| H  | 0.56805  | 2.89073  | 1.44865 |
| Zn | -0.06447 | -0.99096 | 1.21442 |

**ESM Table S6** Cartesian coordinates of atoms in the optimized geometries of [Pt(EMAB)<sub>2</sub>] in gas phase

|   |           |           |           |
|---|-----------|-----------|-----------|
| H | -6.064355 | -2.150529 | -0.933160 |
| C | -6.155336 | -2.948507 | -0.186270 |
| H | -6.075820 | -2.517117 | 0.819954  |
| H | -7.120370 | -3.444884 | -0.296218 |
| O | -5.171284 | -3.968143 | -0.386433 |
| C | -3.869019 | -3.604084 | -0.326963 |
| C | -3.437972 | -2.318304 | -0.060590 |
| C | -2.941248 | -4.646854 | -0.567190 |
| C | -1.604367 | -4.359362 | -0.546877 |
| C | -2.059783 | -2.009857 | -0.052692 |

|   |           |           |           |
|---|-----------|-----------|-----------|
| C | -1.110050 | -3.048996 | -0.311252 |
| H | -4.119963 | -1.499230 | 0.132579  |
| H | -3.311539 | -5.646804 | -0.762211 |
| H | -0.885621 | -5.155970 | -0.725433 |
| O | -1.750413 | -0.776143 | 0.215818  |
| C | 0.292952  | -2.865110 | -0.280238 |
| N | 0.956057  | -1.741172 | -0.144305 |
| H | 0.895598  | -3.774558 | -0.353879 |
| C | 2.377336  | -1.823214 | -0.119292 |
| C | 3.076502  | -1.272051 | 0.955119  |
| C | 3.069070  | -2.436294 | -1.165051 |
| C | 4.452568  | -2.511574 | -1.126095 |
| C | 4.457675  | -1.353020 | 0.994012  |
| C | 5.158123  | -1.973250 | -0.047841 |
| C | 6.637864  | -2.079343 | -0.064487 |
| C | 8.648235  | -1.591155 | 1.108122  |
| C | 9.094737  | -2.932665 | 1.653184  |
| O | 7.201598  | -1.513719 | 1.028266  |
| O | 7.274931  | -2.606053 | -0.953839 |
| H | 8.922128  | -0.773477 | 1.780733  |
| H | 9.068160  | -1.404277 | 0.114788  |
| H | 8.642103  | -3.124144 | 2.630845  |
| H | 10.183615 | -2.937215 | 1.770648  |
| H | 8.819543  | -3.738235 | 0.967925  |
| H | 2.522021  | -0.778024 | 1.746370  |
| H | 5.001497  | -0.932156 | 1.831953  |
| H | 2.518945  | -2.822263 | -2.018495 |

|    |           |           |           |
|----|-----------|-----------|-----------|
| H  | 5.008731  | -2.975269 | -1.934444 |
| Pt | 0.039933  | 0.068630  | -0.111297 |
| N  | -0.921817 | 1.846941  | -0.137490 |
| O  | 1.830055  | 0.936157  | -0.403965 |
| C  | -2.347628 | 1.831734  | -0.146601 |
| C  | -3.066643 | 2.284926  | 0.956577  |
| C  | -3.011681 | 1.274966  | -1.240929 |
| C  | -4.448244 | 2.144807  | 0.984827  |
| C  | -4.385508 | 1.131909  | -1.209326 |
| C  | -5.114004 | 1.545588  | -0.087453 |
| C  | -6.568107 | 1.257946  | -0.061505 |
| C  | -8.601965 | 1.541835  | 1.138053  |
| C  | -8.814084 | 0.200553  | 1.810634  |
| O  | -7.187624 | 1.834890  | 0.992429  |
| O  | -7.139797 | 0.568767  | -0.884039 |
| H  | -5.008573 | 2.465890  | 1.855664  |
| H  | -4.915933 | 0.674206  | -2.038198 |
| H  | -2.533982 | 2.689692  | 1.812312  |
| H  | -2.430183 | 0.916104  | -2.084324 |
| H  | -8.981979 | 2.362869  | 1.752023  |
| H  | -9.074302 | 1.573436  | 0.151389  |
| H  | -9.883451 | 0.041238  | 1.984472  |
| H  | -8.299118 | 0.164597  | 2.775414  |
| H  | -8.445746 | -0.611056 | 1.177636  |
| C  | -0.313420 | 3.002619  | -0.094813 |
| C  | 1.084119  | 3.235537  | -0.121385 |
| C  | 2.078817  | 2.210128  | -0.294409 |



|   |           |          |           |
|---|-----------|----------|-----------|
| C | 3.429262  | 2.598514 | -0.367296 |
| C | 3.803187  | 3.927208 | -0.267751 |
| C | 1.514036  | 4.579502 | -0.036210 |
| C | 2.836523  | 4.944690 | -0.097406 |
| C | 5.586691  | 5.518560 | -0.247437 |
| H | 5.185523  | 6.133475 | -1.063189 |
| H | 5.314283  | 5.961670 | 0.719004  |
| H | 6.673602  | 5.473190 | -0.330762 |
| O | 5.137250  | 4.168585 | -0.345085 |
| H | 4.183489  | 1.830557 | -0.502260 |
| H | 0.758600  | 5.353073 | 0.082370  |
| H | 3.114204  | 5.988029 | -0.023628 |
| H | -0.952934 | 3.889520 | -0.065669 |

**ESM Table S7** Cartesian coordinates of atoms in the optimized geometries of [Ni(EMAB)<sub>2</sub>] in gas phase

|   |          |          |          |
|---|----------|----------|----------|
| H | -6.24169 | -3.35498 | 1.89323  |
| C | -6.03428 | -4.42821 | 1.80304  |
| H | -5.39288 | -4.74908 | 2.63288  |
| H | -6.97111 | -4.98606 | 1.82697  |
| O | -5.43619 | -4.73176 | 0.54370  |
| C | -4.24305 | -4.16532 | 0.23256  |
| C | -3.54604 | -3.30126 | 1.06406  |
| C | -3.73086 | -4.52366 | -1.04429 |
| C | -2.53053 | -3.99512 | -1.44346 |
| C | -2.30042 | -2.74099 | 0.67080  |
| C | -1.77480 | -3.09582 | -0.63109 |
| H | -3.90985 | -3.01363 | 2.04192  |
| H | -4.30177 | -5.20200 | -1.66764 |

|   |          |          |          |
|---|----------|----------|----------|
| H | -2.13215 | -4.26401 | -2.41928 |
| O | -1.70714 | -1.94458 | 1.51030  |
| C | -0.55205 | -2.61602 | -1.17877 |
| N | 0.30567  | -1.78625 | -0.62839 |
| H | -0.30776 | -2.99898 | -2.17525 |
| C | 1.41755  | -1.32395 | -1.37064 |
| C | 2.63975  | -1.14303 | -0.69920 |
| C | 1.32054  | -0.97831 | -2.73141 |
| C | 2.43411  | -0.49123 | -3.40905 |
| C | 3.74880  | -0.65313 | -1.37998 |
| C | 3.65789  | -0.32639 | -2.74333 |
| C | 4.81160  | 0.20502  | -3.51844 |
| C | 7.12151  | 0.81200  | -3.43336 |
| C | 7.82994  | -0.30777 | -4.18258 |
| O | 5.93044  | 0.32408  | -2.76596 |
| O | 4.76488  | 0.50450  | -4.70022 |
| H | 7.73700  | 1.20590  | -2.62102 |
| H | 6.84167  | 1.62661  | -4.10712 |
| H | 8.07485  | -1.13156 | -3.50472 |
| H | 8.76136  | 0.07020  | -4.61884 |
| H | 7.19862  | -0.68589 | -4.99061 |
| H | 2.70011  | -1.39428 | 0.35461  |
| H | 4.68946  | -0.52179 | -0.85776 |
| H | 0.36705  | -1.05666 | -3.24481 |
| H | 2.36842  | -0.21465 | -4.45626 |
| N | -0.26327 | 1.03916  | 1.11244  |
| O | 1.44573  | -0.97684 | 2.41046  |

|   |          |          |          |
|---|----------|----------|----------|
| C | -1.40691 | 1.61855  | 0.51341  |
| C | -2.01871 | 2.77675  | 1.02636  |
| C | -1.97818 | 0.98043  | -0.60190 |
| C | -3.15294 | 3.30320  | 0.41316  |
| C | -3.10972 | 1.50722  | -1.21062 |
| C | -3.70612 | 2.67713  | -0.71394 |
| C | -4.91954 | 3.19488  | -1.40258 |
| C | -6.60067 | 4.89348  | -1.40883 |
| C | -7.85293 | 4.18013  | -0.91905 |
| O | -5.40593 | 4.31710  | -0.82236 |
| O | -5.42481 | 2.67502  | -2.38332 |
| H | -3.62473 | 4.19180  | 0.81693  |
| H | -3.54999 | 1.02264  | -2.07566 |
| H | -1.63000 | 3.24136  | 1.92703  |
| H | -1.52043 | 0.07523  | -0.98454 |
| H | -6.57742 | 5.93661  | -1.08463 |
| H | -6.51726 | 4.84807  | -2.49820 |
| H | -8.74285 | 4.67708  | -1.32123 |
| H | -7.90844 | 4.20301  | 0.17391  |
| H | -7.85649 | 3.14020  | -1.25519 |
| C | 0.67178  | 1.81276  | 1.61014  |
| C | 1.84002  | 1.42278  | 2.33072  |
| C | 2.17101  | 0.06334  | 2.71347  |
| C | 3.35823  | -0.14007 | 3.45139  |
| C | 4.19853  | 0.91171  | 3.79671  |
| C | 2.72754  | 2.46505  | 2.70819  |
| C | 3.88719  | 2.24442  | 3.42148  |

|    |          |          |         |
|----|----------|----------|---------|
| C  | 6.22841  | 1.59080  | 4.89128 |
| H  | 6.65308  | 2.10256  | 4.01866 |
| H  | 5.75275  | 2.32458  | 5.55377 |
| H  | 7.02430  | 1.07767  | 5.43256 |
| O  | 5.31109  | 0.57187  | 4.50061 |
| H  | 3.61304  | -1.15132 | 3.74743 |
| H  | 2.47763  | 3.48343  | 2.41847 |
| H  | 4.53020  | 3.07435  | 3.68327 |
| H  | 0.56805  | 2.89073  | 1.44865 |
| Ni | -0.06447 | -0.99096 | 1.21442 |

**ESM Table S8** Cartesian coordinates of atoms in the optimized geometries of Cu[EMAB]<sub>2</sub> in gas phase

|   |          |          |          |
|---|----------|----------|----------|
| H | -6.01040 | -1.89528 | 0.06196  |
| C | -6.06813 | -2.75033 | 0.74660  |
| H | -5.89804 | -2.41917 | 1.77897  |
| H | -7.05368 | -3.21180 | 0.66926  |
| O | -5.13666 | -3.76985 | 0.37251  |
| C | -3.82275 | -3.44773 | 0.34731  |
| C | -3.31336 | -2.22353 | 0.74584  |
| C | -2.97298 | -4.47058 | -0.13824 |
| C | -1.63116 | -4.22382 | -0.23589 |
| C | -1.92821 | -1.95562 | 0.65235  |
| C | -1.06603 | -2.97616 | 0.12776  |
| H | -3.93976 | -1.42405 | 1.12209  |
| H | -3.40797 | -5.41918 | -0.43146 |
| H | -0.97035 | -5.00056 | -0.61469 |
| O | -1.49675 | -0.79969 | 1.04464  |
| C | 0.33220  | -2.80652 | -0.00775 |

|   |          |          |          |
|---|----------|----------|----------|
| N | 1.02334  | -1.71865 | 0.22095  |
| H | 0.89058  | -3.69747 | -0.32155 |
| C | 2.42235  | -1.78323 | 0.00939  |
| C | 3.29203  | -1.44775 | 1.05026  |
| C | 2.93998  | -2.16366 | -1.23275 |
| C | 4.31109  | -2.22236 | -1.42462 |
| C | 4.66103  | -1.51496 | 0.85811  |
| C | 5.18363  | -1.90024 | -0.38259 |
| C | 6.64033  | -1.97917 | -0.64711 |
| C | 8.81484  | -1.70214 | 0.27584  |
| C | 9.31610  | -3.11770 | 0.47963  |
| O | 7.37493  | -1.62974 | 0.43555  |
| O | 7.12548  | -2.31214 | -1.70939 |
| H | 9.20302  | -1.02485 | 1.04178  |
| H | 9.08092  | -1.32403 | -0.71621 |
| H | 9.01514  | -3.49797 | 1.46053  |
| H | 10.40985 | -3.13228 | 0.42483  |
| H | 8.92421  | -3.78034 | -0.29606 |
| H | 2.87855  | -1.13636 | 2.00327  |
| H | 5.33460  | -1.26627 | 1.67043  |
| H | 2.25902  | -2.38943 | -2.04880 |
| H | 4.72847  | -2.51013 | -2.38430 |
| N | -0.88966 | 1.69954  | -0.01847 |
| O | 1.76837  | 0.99244  | 0.64595  |
| C | -2.28591 | 1.59063  | -0.20225 |
| C | -3.17604 | 2.34663  | 0.56690  |
| C | -2.78349 | 0.67499  | -1.13524 |

|   |           |          |          |
|---|-----------|----------|----------|
| C | -4.54415  | 2.18269  | 0.41204  |
| C | -4.14666  | 0.51070  | -1.28675 |
| C | -5.04187  | 1.25662  | -0.50958 |
| C | -6.48947  | 0.99135  | -0.66784 |
| C | -8.68277  | 1.60973  | 0.01298  |
| C | -9.08586  | 0.50724  | 0.97162  |
| O | -7.25105  | 1.84257  | 0.05740  |
| O | -6.94899  | 0.10372  | -1.36086 |
| H | -5.23170  | 2.75520  | 1.02447  |
| H | -4.54312  | -0.20664 | -1.99819 |
| H | -2.78737  | 3.02536  | 1.32079  |
| H | -2.08645  | 0.08307  | -1.72124 |
| H | -9.11795  | 2.57041  | 0.30160  |
| H | -8.97228  | 1.37100  | -1.01508 |
| H | -10.17636 | 0.40737  | 0.97994  |
| H | -8.75335  | 0.73664  | 1.98857  |
| H | -8.65726  | -0.44936 | 0.66129  |
| C | -0.35747  | 2.89376  | -0.04935 |
| C | 1.00125   | 3.22593  | 0.16047  |
| C | 2.01419   | 2.25354  | 0.48260  |
| C | 3.33949   | 2.70530  | 0.62617  |
| C | 3.66327   | 4.04402  | 0.48167  |
| C | 1.37758   | 4.57993  | 0.01828  |
| C | 2.67355   | 5.00702  | 0.17443  |
| C | 5.37705   | 5.71143  | 0.50067  |
| H | 5.16905   | 6.07957  | -0.51198 |
| H | 4.88553   | 6.35815  | 1.23863  |

|    |          |         |          |
|----|----------|---------|----------|
| H  | 6.45421  | 5.71964 | 0.67379  |
| O  | 4.97429  | 4.35123 | 0.65146  |
| H  | 4.11467  | 1.98191 | 0.85567  |
| H  | 0.60593  | 5.30696 | -0.22571 |
| H  | 2.91639  | 6.05510 | 0.05752  |
| H  | -1.01990 | 3.73329 | -0.29427 |
| Cu | 0.12226  | 0.05304 | 0.49811  |

## B. Supplementary data for the calculation of reorganization energies for the hole and the electron

### Reorganization Energies for the electron

|                 |                                     | EMAB         | Pt           | Pd           | Zn           | Ir           | Rh           | Ni           |
|-----------------|-------------------------------------|--------------|--------------|--------------|--------------|--------------|--------------|--------------|
| $E_+^-$         |                                     | -1013.001178 | -2144.216271 | -2152.754726 | -3804.038896 | -2129.097256 | -2135.384028 | -3532.977333 |
| $E_0^-$         |                                     | -1013.012075 | -2144.223632 | -2152.762351 | -3804.0497   | -2129.108999 | -2135.386626 | -3533.053    |
| $E_0^- - E_+^-$ |                                     | 0.010897     | 0.007361     | 0.007625     | 0.010804     | 0.011743     | 0.002598     | 0.075667     |
| $E_0^0$         |                                     | -1012.959224 | -2144.17257  | -2152.711174 | -3803.998766 | -2128.917858 | -2135.137567 | -3532.977332 |
| $E_0^0$         |                                     | -1012.970821 | -2144.182911 | -2152.721563 | -3805.096064 | -2128.939729 | -2135.142873 | -3532.94296  |
| $E_0^0 - E_0^0$ |                                     | 0.011597     | 0.010341     | 0.010389     | 1.097298     | 0.021871     | 0.005306     | -0.034372    |
| $\lambda_e$     | $(E_0^- - E_+^-) + (E_0^0 - E_0^0)$ | 0.022494     | 0.017702     | 0.018014     | 1.108102     | 0.033614     | 0.007904     | 0.041295     |
|                 |                                     | EMAB         | Pt           | Pd           | Zn           | Ir           | Rh           | Ni           |
| Multiplied by   |                                     |              |              |              |              |              |              |              |
| 27.21138        |                                     | 0.612092782  | 0.481695849  | 0.490185799  | 30.15256352  | 0.914683327  | 0.215078748  | 1.123693937  |

### Reorganization energies for the hole

|                 |                                     |              |              |              |              |              |              |              |
|-----------------|-------------------------------------|--------------|--------------|--------------|--------------|--------------|--------------|--------------|
| $E_0^+$         |                                     | -1012.692396 | -2143.944635 | -2152.477218 | -3803.738842 | -2128.565999 | -2134.783638 | -3532.698086 |
| $E_+^+$         |                                     | -1012.699698 | -2143.949284 | -2152.480472 | -3803.745624 | -2128.579997 | -2134.784273 | -3532.70092  |
| $E_0^+ - E_+^+$ |                                     | 0.007302     | 0.004649     | 0.003254     | 0.006782     | 0.013998     | 0.000635     | 0.002834     |
| $E_0^0$         |                                     | -1012.964319 | -2144.180744 | -2152.719668 | -3803.991597 | -2128.929047 | -2135.137246 | -3532.940383 |
| $E_0^0$         |                                     | -1012.970821 | -2144.182911 | -2152.721563 | -3805.094064 | -2128.939027 | -2135.142873 | -3532.942957 |
| $E_0^0 - E_0^0$ |                                     | 0.006502     | 0.002167     | 0.001895     | 1.102467     | 0.0099797    | 0.005627     | 0.002574     |
| $\lambda_h$     | $(E_0^+ - E_+^+) + (E_0^0 - E_0^0)$ | 0.013804     | 0.006816     | 0.005149     | 1.109249     | 0.0239777    | 0.006262     | 0.005408     |
|                 |                                     | EMAB         | Pt           | Pd           | Zn           | Ir           | Rh           | Ni           |
| Multiplied by   |                                     |              |              |              |              |              |              |              |
| 27.21138        |                                     | 0.37562589   | 0.185472766  | 0.140111396  | 30.19241559  | 0.652466306  | 0.170397662  | 0.147159143  |



### C. UV-Visible spectra for EMAB and its studied derivatives

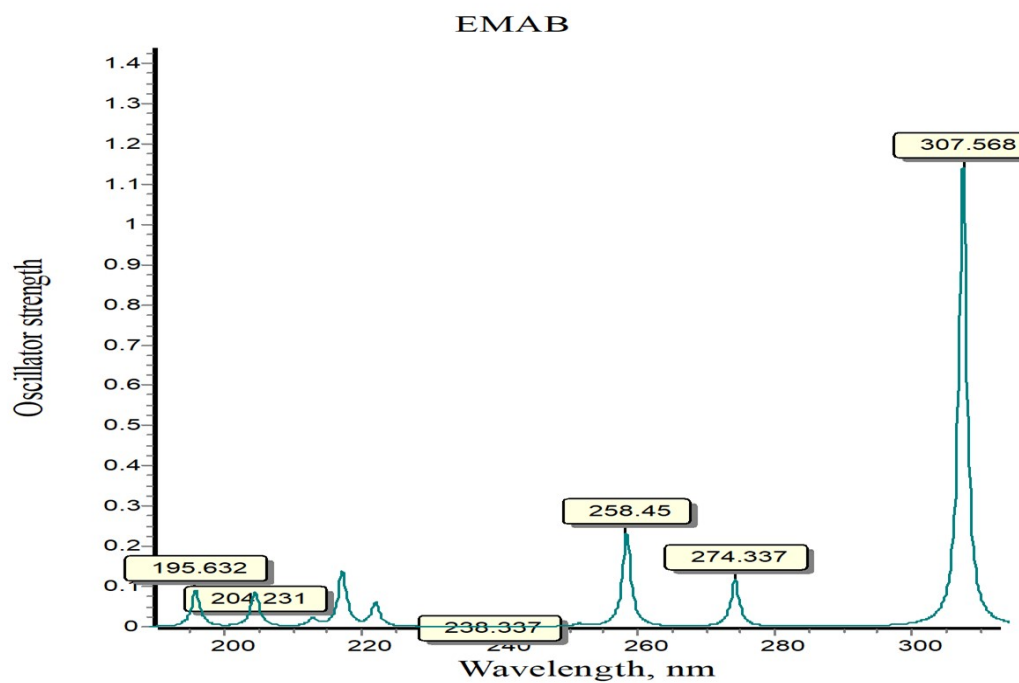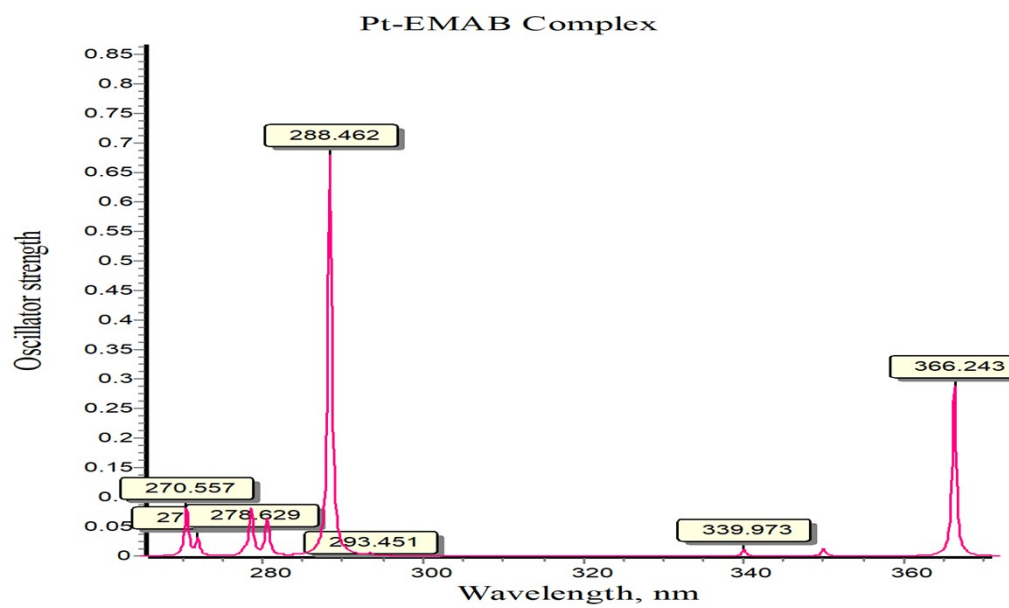

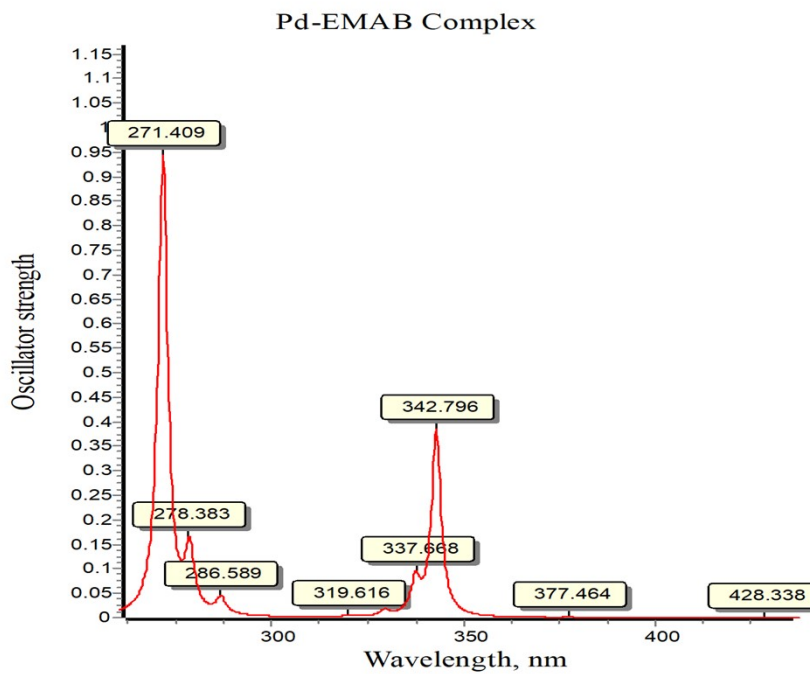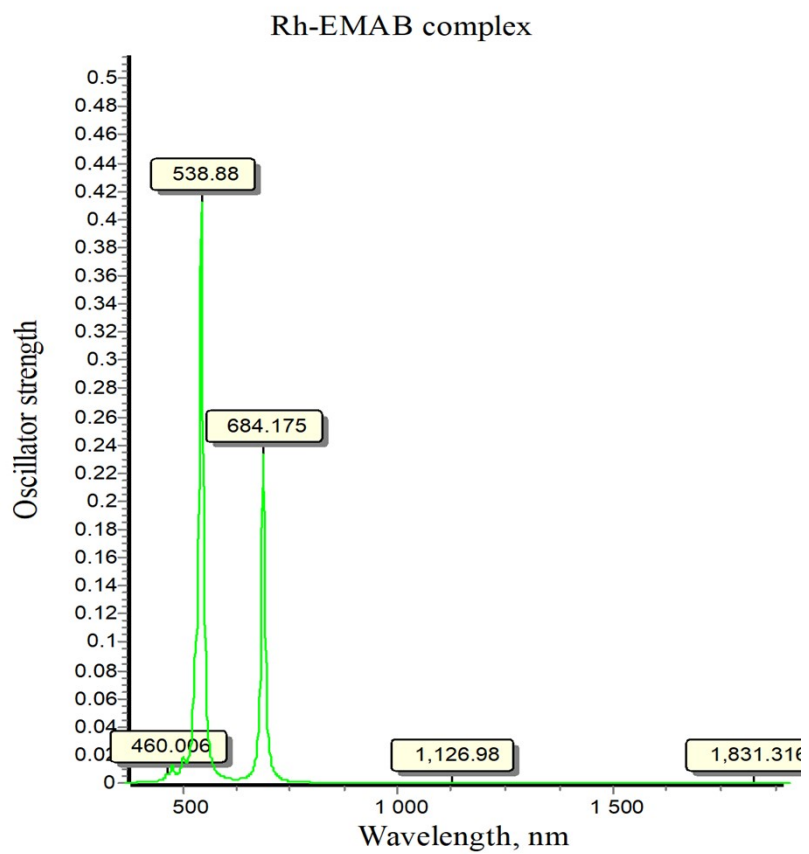

# Ni-EMAB complex

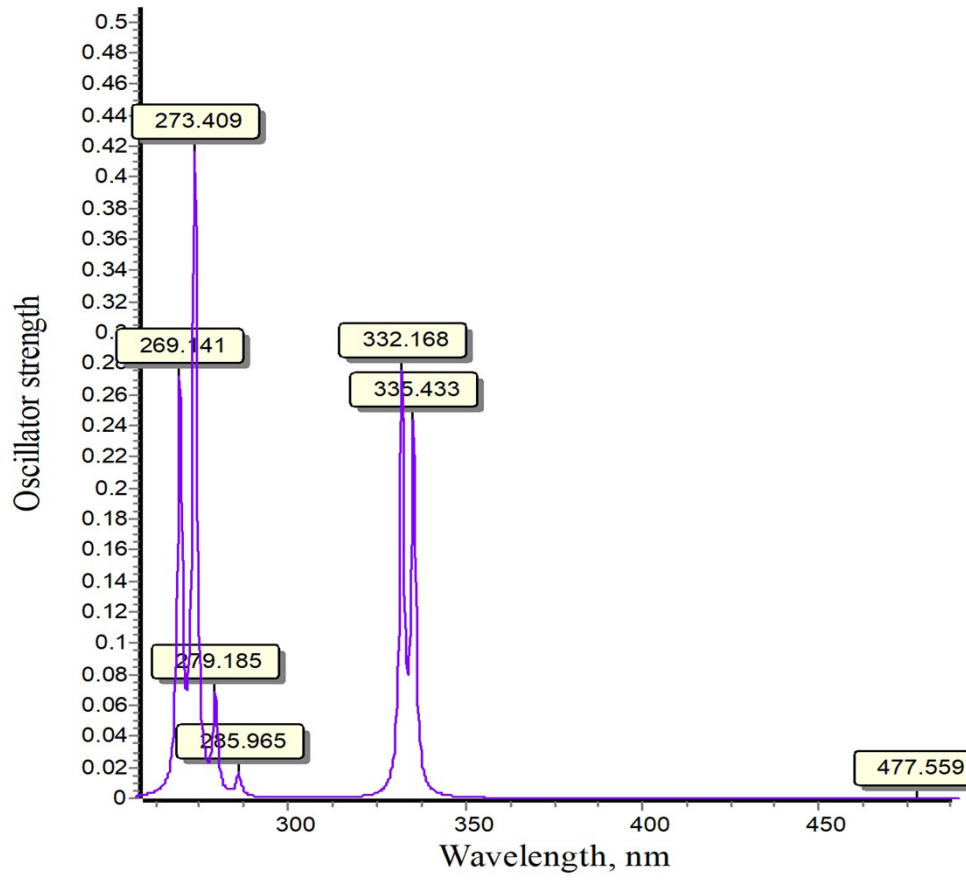

Supplement: d4ra02250e1.pdf [file d4ra02250e1.pdf]
